# A Longitudinal Study Examining Adherence to Guidelines in Diabetes Care According to Different Definitions of Adequacy and Timeliness

Grigory Sidorenkov<sup>1,2</sup>, Flora M. Haaijer-Ruskamp<sup>1,2</sup>, Dick de Zeeuw<sup>1</sup>, Petra Denig<sup>1,2\*</sup>

<sup>1</sup> Department of Clinical Pharmacology, University Medical Center Groningen, University of Groningen, Groningen, The Netherlands, <sup>2</sup> Research Institute SHARE of the Graduate School of Medical Sciences, University Medical Center Groningen, University of Groningen, Groningen, The Netherlands

## Abstract

**Background:** Performance indicators assessing quality of diabetes care often look at single processes, e.g. whether an HbA1c test was conducted. Adequate care, however, consists of consecutive processes which should be taken in time (clinical pathways). We assessed quality of diabetes care by looking at single processes versus clinical pathways. In addition, we evaluated the impact of time period definitions on this quality assessment.

**Methodology:** We conducted a cohort study in 2007–2008 using the GIANNT (Groningen Initiative to Analyse type 2 diabetes Treatment) database. Proportions of patients adequately managed for HbA1c, systolic blood pressure (SBP), LDL-cholesterol (LDL-C), and albumin/creatinin ratio (ACR) were calculated for the pathway of (1) risk factor level testing, (2) treatment intensification when indicated, (3) response to treatment evaluation. Strict and wide time periods for each step were defined. Proportions of patients adequately managed regarding the overall pathway and single steps, using strict or wide time periods were compared using odds ratios (OR) with 95% confidence intervals.

**Findings:** Of 11176 patients diagnosed with type 2 diabetes, 9439 with complete follow-up were included. The majority received annual examination of HbA1c (86%) and SBP (86%), whereas this was 67% for LDL-C and 49% for ACR. Adequate management regarding the three-step pathway was observed in 73%, 53%, 46%, 41% of patients for HbA1c, SBP, LDL-C, and ACR respectively. Quality scores reduced significantly due to the second step (OR 0.43, 0.18, 0.44, 0.74), but were not much further reduced by the third step. Timely treatment evaluation occurred in 88% for HbA1c, 87% for SBP, 83% for LDL-C, and 76% for ACR. The overall score was not significantly changed by using strict time windows.

**Conclusion:** Quality estimates of glycemic, blood pressure and cholesterol management are substantially reduced when looking at clinical pathways as compared to estimates based on commonly used simple process measures.

**Citation:** Sidorenkov G, Haaijer-Ruskamp FM, de Zeeuw D, Denig P (2011) A Longitudinal Study Examining Adherence to Guidelines in Diabetes Care According to Different Definitions of Adequacy and Timeliness. PLoS ONE 6(9): e24278. doi:10.1371/journal.pone.0024278

**Editor:** Joseph S. Ross, Yale University School of Medicine, United States of America

**Received:** April 1, 2011; **Accepted:** August 6, 2011; **Published:** September 8, 2011

**Copyright:** © 2011 Sidorenkov et al. This is an open-access article distributed under the terms of the Creative Commons Attribution License, which permits unrestricted use, distribution, and reproduction in any medium, provided the original author and source are credited.

**Funding:** The study was funded by the Research Institute SHARE of the Groningen Graduate School of Medical Sciences, University Medical Center Groningen, The Netherlands. The funders had no role in study design, data collection and analysis, decision to publish, or preparation of the manuscript.

**Competing Interests:** The authors have declared that no competing interests exist.

\* E-mail: p.denig@med.umcg.nl

## Introduction

Process of care indicators are often used to assess the quality of diabetes care [1,2]. Most of them look at specific actions in isolation, measuring processes of care such as ‘percentages of patients with type 2 diabetes who received an HbA1c test in a year’. They do not reflect the overall pathway of risk factor management as described in clinical practice guidelines, which includes (1) a periodic test of the risk factors, (2) the initiation or adjustment of drug treatment in patients with elevated risk factor levels, and (3) the subsequent evaluation of response to this treatment [3]. Estimates of quality of diabetes care show that monitoring of risk factors may reach levels of 75–95% [4,5], whereas treatment intensification rates in subsets of patients with elevated risk factor levels may be as low as 15–57% [6–11]. From these studies, it is not clear how many patients receive suboptimal risk factor management considering all steps in succession. Nor is it

clear how much the estimate of quality is lowered by adding the subsequent steps. Some studies have tried to quantify the overall quality of care for risk factor management using composite scores of commonly available process and outcome indicators [12,13], but none of them have quantified the quality of the process of care as a whole.

Looking at clinical pathways, one not only assesses whether actions were taken but whether they were taken at the right time. The timing of actions, however, is not as clearly specified in clinical guidelines for diabetes [14–16]. Recommendations for optimal time periods can be based on evidence and expert opinion as well as feasibility for patients and health care organizations [17,18]. For quality assessment, there is consensus that risk factors should be monitored at least annually [19–22]. Regarding the initiation or intensification of treatment in patients with elevated risk factor levels, no specific time periods are indicated in the guidelines. Several professionals advocate prompt action [23–25],

whereas others consider some delay as reasonable [26]. In research on quality of diabetes care, time periods for treatment intensification range from 14 days to 6 months [6–8,27–29]. Other studies did not clearly specify the time periods used [9,10,30,31]. Regarding the subsequent evaluation of response to treatment, guideline recommendations are inconsistent, and have not been translated to process of care assessment in the field of diabetes care [19–22,32].

The aim of our study is to assess the quality of diabetes care by looking at the overall pathway of testing for elevated risk factor levels, intensification of treatment, and response to treatment evaluation, and compare this with quality as reflected by the isolated steps of risk factor management. In addition, we will evaluate the impact using different definitions of timeliness on this quality assessment, and intend to propose reasonable time periods for actions as can be derived from current clinical practice.

## Methods

We conducted a longitudinal observational study using data collected from the Groningen Initiative to Analyse Type 2 diabetes Treatment (GIANTT) database. At the time of our study, the GIANTT database consisted of anonymous longitudinal data collected from medical records of more than 20,000 patients with type 2 diabetes registered in 100 general practices in the north of the Netherlands. The database includes all general practice prescriptions, routine laboratory measurements and physical examinations as documented in the electronic patient records. Our study covers the period from the beginning of 2007 till the end of 2008. Included were patients diagnosed with type 2 diabetes before 1<sup>st</sup> January 2007, who were managed for diabetes by their general practitioner, and had complete follow-up during the study period.

## Outcome measures

The outcome measures were quality of care measures derived from the prevailing guideline recommendations at the time of our study. This type of measures has been found face and content valid [21,32,33]. For each of the risk factors, we calculated percentages of (1) all patients with at least one risk factor test in 2007, (2) patients with an elevated risk factor in 2007, and not on maximum treatment or returning to control, who received a related treatment intensification, (3) patients with such a treatment intensification who received a subsequent evaluation of response to treatment, and finally (4) patients receiving adequate care for all three steps of this clinical pathway. Patients were considered ‘adequately managed’ when they received care as indicated by guideline recommendations [16], including also patients with adequate risk factor levels in whom no further steps need to be taken, and patients on maximum treatment.

We included the following risk factors: HbA1c, systolic blood pressure (SBP), LDL-cholesterol (LDL-C), and albumin/creatinine ratio (ACR). We used recommendations from the prevailing Dutch guidelines to define the actions that should be taken [16]. They recommend that these risk factors should be tested every year in all patients with type 2 diabetes. The first elevated test result of a risk factor in 2007 was considered as the index moment for further actions if it did not return to control within 120 days. Intensification of treatment is recommended for patients with HbA1c > 7%; SBP ≥ 140 mmHg; LDL-C > 2.5 mmol/l; ACR (males) ≥ 2.5 mg/mmol; ACR (females) ≥ 3.5 mg/mmol [16]. Intensification of treatment was defined as the start or addition of a new drug class or a dosage increase of respectively glucose lowering, blood pressure lowering, and lipid-lowering medication.

For elevated ACR levels, the start or dosage increase of a renin-angiotensin-aldosterone system intervention (RAAS-i) was defined as intensification of treatment. Evaluation of response to treatment was defined as testing of the corresponding risk factor after treatment intensification. For glucose lowering medication, either testing of HbA1c or fasting blood glucose (FBG) testing was considered as evaluation of response to treatment. Although the primary reason for this test might not be to evaluate a treatment response, the test results reflect the risk factor level after a change of treatment and we assume that this is taken into account as such by the health care provider.

Patients on maximum treatment were excluded from the total number of patients with elevated risk factor levels when calculating percentages of patients who received intensification of treatment. Maximum treatment was defined according to guideline [16]. For glucose-lowering medication, prescription of insulin was considered as having reached maximum treatment. For blood-pressure-lowering medication, prescription of 3 or more drugs from different classes at maximum maintenance dosage was considered as maximum treatment. For lipid-lowering medication, prescription of one drug at maximum dosage was considered maximum treatment. Prescribing of either an angiotensin-converting enzyme inhibitor or an angiotensin-II-receptor antagonist at maximum dosage was considered maximum treatment for elevated ACR levels. Dosage recommendations were obtained from the *Dutch Pharmacotherapy Compendium* [34].

## Time periods for quality assessment

We first set wide periods of 180 days for subsequent steps of action as have been used in previous studies [6–8,28]. Next, we defined the following time periods for treatment intensification: prompt reaction (within 30 days), lenient reaction (within 31–120 days), and delayed reaction (within 121–180 days). The time period of 30 days for prompt action takes into account that some time may pass between the date of a risk factor test in the medical record and the actual prescriber-patient contact when treatment can be intensified. As lenient time period, we used a period of 120 days, as suggested in some studies. This takes delays until the next regular visit due to competing demands or clinical uncertainty into account [9,25,26]. For response to treatment evaluation, we set the following time periods: too early reaction which could be tests conducted for other reasons (within 42 days for HbA1c, within 14 days for SBP, and within 21 days for LDL-C), timely reaction including a first or second test after treatment intensification (43–120 days for HbA1c or 1–120 days for FBG, 15–120 days for SBP, 22–120 days for LDL-C, and within 365 days for ACR), and delayed reaction (121–180 days for HbA1c/FBG, SBP, LDL-C). The time periods for too early reactions were based on guideline recommendations [16]. Changes in HbA1c levels should be measured after a minimum period of 42 days, because HbA1c reflects average glycemia over the preceding 6 weeks. No limitations are stated for evaluation of changes in FBG level. Changes in SBP level in response to treatment should be measured after 2–4 weeks. LDL-C should be measured after several weeks, which we considered to be at least 3 weeks. Regarding evaluation of ACR in response to RAAS-i treatment there is only the recommendation for annual audit.

## Time periods derived from clinical practice

Time periods for actions can be set using evidence and expert opinion as well as feasibility for patients and health care organizations [17,18]. To determine reasonable time periods for treatment intensification, we assessed feasibility by comparing our predetermined time periods with the actual distribution of cases

observed for such intensifications. We calculated the number of patients receiving treatment intensification over time, using 10-day intervals after the index date. For response to treatment evaluation, we calculated the number of patients receiving a subsequent risk factor test over time after the treatment intensification date, and assessed whether a change in the risk factor levels could be observed. We used 10-day intervals for HbA1c and SBP and 20-day intervals for LDL-C and ACR (to gain higher numbers of eligible cases) after the date of treatment intensification. The changes in risk factor level were calculated as the mean difference between the risk factor level after and before the treatment intensification. The timing for evaluation of response to treatment was considered too early when the mean changes in risk factor level did not yet reach a significant change.

## Analysis

Descriptive analysis are presented showing percentages of patients in each step of the clinical pathway as well adequately managed for the overall clinical pathway using (1) wide time periods of 180 days, and (2) strict time periods, including prompt and lenient reactions of treatment intensification and timely reactions of response to treatment evaluation. Using odds ratios (OR) and 95% confidence intervals (CI) we compared the proportions of patients who were adequately managed in the overall three-step pathway of risk factor management (1) with those adequately managed only regarding the first step of the clinical pathway, and (2) with those adequately managed regarding the first and second step. Furthermore, we compared the proportions of patients who were adequately managed using wide or strict time periods.

For the mean changes in risk factor levels after treatment per 10-day or 20-day interval, we present 95% confidence intervals. To test for significant differences over time we used independent t-tests.

## Results

Overall, 11176 patients diagnosed with type 2 diabetes before 1<sup>st</sup> of January 2007 were available for the study, of whom 9439 (84.5%) had complete follow-up until the end of 2008 and were included in our study, whereas 1737 (15.5%) died or moved to another region. Patients were at baseline on average 66 years of age with a diabetes duration of almost 6 years (Table 1).

### Glucose management

6878 (73%) patients were adequately managed in the three-step pathway using the wide time periods of 180 days (Table 2). 8144

(86%) patients received at least one HbA1c test in 2007. Of the 1975 patients above target, not returning to control and not on maximum treatment, only 759 (38%) received a treatment intensification. Treatment intensification was prompt for 419 (55%), lenient for 262 (35%) and delayed for 78 (10%) of these patients (Table 3). The highest peak for treatment intensification occurred within the first 10 days (Figure 1a). Most of patients (93%), had a next HbA1c or FBG test within 180 days after the treatment intensification (Table 2). For 563 (88%) of these patients, this was considered as a timely reaction (Table 3). Evaluation of response to treatment most often occurred close to the time of the next regular practice visit (Figure 2a). Mean changes in HbA1c significantly improved and leveled off after 20 days since treatment intensification ( $p = 0.04$ ). The quality score regarding adequate management reduced significantly due to the second step but was not much further reduced by the third step (Table 2). The overall score for adequate management was not significantly higher using wide time periods (73%) in comparison to using strict time windows (72%; OR 1.06, 95% CI 0.99–1.12).

### Blood pressure management

4968 (53%) patients were adequately managed in the clinical pathway using the wide time periods of 180 days (Table 2). 8140 (86%) patients received at least one SBP test in 2007. Of the 3864 patients above target, not returning to control and not on maximum treatment, only 895 (23%) received a treatment intensification. Treatment intensification was prompt for 422 (47%), lenient for 346 (39%), and delayed for 127 (14%) of these patients (Table 3). The highest peak for treatment intensification occurred within the first 10 days (Figure 1b). Most of patients (77%), had a next SBP test within 180 days after the treatment intensification (Table 2). For 514 (87%) of these patients, this was considered as timely (Table 3). Evaluation of response to treatment most often occurred within 30 days after index visit to health care provider (Figure 2b). Mean changes in SBP significantly improved and leveled off after 10 days since treatment intensification ( $p = 0.03$ ). The quality score regarding adequate management reduced significantly due to the second step, and slightly by the third step (Table 2). The overall score for adequate management was not significantly higher using wide time periods (53%) in comparison to using strict time windows (53%; OR 1.00, 95% CI 0.94–1.06).

### LDL-cholesterol management

4383 (46%) patients were adequately managed in the clinical pathway using the wide time periods of 180 days (Table 2). 6264 (67%) patients received at least one LDL-C test in 2007. Of the

**Table 1.** Patient characteristics at baseline.

|                                   | Number of patients with observation (%) | Mean $\pm$ standard deviation |
|-----------------------------------|-----------------------------------------|-------------------------------|
| Age (years)                       | 9439                                    | 66 $\pm$ 12.1                 |
| Male gender                       | 4493 (47.6)                             |                               |
| Diabetes duration (years)         | 9439                                    | 5.6 $\pm$ 5.6                 |
| HbA1c (%)                         | 8144                                    | 6.8 $\pm$ 1.0                 |
| Systolic blood pressure (mmHg)    | 8140                                    | 142.8 $\pm$ 20.5              |
| LDL-cholesterol (mmol/l)          | 6264                                    | 2.4 $\pm$ 0.9                 |
| Total cholesterol (mmol/l)        | 6424                                    | 4.4 $\pm$ 1.1                 |
| Albumin/creatinin ratio (mg/mmol) | 4604                                    | 4.0 $\pm$ 15.3                |

doi:10.1371/journal.pone.0024278.t001

**Table 2.** Percentages of patients who received recommended care within wide time periods of 180 days.

|                                                                                                                      | HbA1c             | SBP              | LDL-C            | ACR              |
|----------------------------------------------------------------------------------------------------------------------|-------------------|------------------|------------------|------------------|
|                                                                                                                      | n = 9439          | n = 9439         | n = 9439         | n = 9439         |
| Adequately managed in the clinical pathway as indicated within time periods of 180 days                              | 6878 (73%)        | 4968 (53%)       | 4383 (46%)       | 3905 (41%)       |
| <i>Step 1 Risk factor testing in whole population</i>                                                                |                   |                  |                  |                  |
| Risk factor test in 2007                                                                                             | 8144 (86%)        | 8140 (86%)       | 6264 (67%)       | 4604 (49%)       |
| - elevated level                                                                                                     | 2556 (31%)        | 4713 (58%)       | 2332 (37%)       | 1165 (25%)       |
| - return to control within 120 days                                                                                  | 339 (13%)         | 776 (16%)        | 117 (5%)         | 187 (16%)        |
| - maximum treatment                                                                                                  | 242 (9%)          | 73 (2%)          | 150 (6%)         | 227 (19%)        |
| Odds Ratio (95%CI) of adequate management step 1 versus all 3 steps                                                  | 0.43 (0.35–0.50)  | 0.18 (0.11–0.25) | 0.44 (0.38–0.50) | 0.74 (0.68–0.80) |
| <i>Step 2 Treatment intensification in patients with elevated risk factor level who are not on maximum treatment</i> |                   |                  |                  |                  |
|                                                                                                                      | n = 1975          | n = 3864         | n = 2065         | n = 751          |
| Intensification of treatment within 180 days                                                                         | 759 (38%)         | 895 (23%)        | 355 (17%)        | 136 (18%)        |
| Odds Ratio (95%CI) of adequate management of steps 1 and 2 versus all 3 steps                                        | 20.97 (0.91–1.04) | 0.92 (0.86–0.97) | 0.93 (0.87–0.99) | 0.96 (0.91–1.02) |
| <i>Step 3 Evaluation of response to treatment in patients who received intensification of treatment</i>              |                   |                  |                  |                  |
|                                                                                                                      | n = 759           | n = 895          | n = 355          | n = 136          |
| Evaluation of response to treatment within 180 days                                                                  | 709 (93%)*        | 692 (77%)        | 184 (52%)        | 52 (38%)         |

\*First test of HbA1c or fasting blood glucose observed after intensification of treatment.

doi:10.1371/journal.pone.0024278.t002

2065 patients above target, not returning to control and not on maximum treatment, only 355 (17%) received a treatment intensification. Treatment intensification was prompt for 205 (58%), lenient for 103 (29%), and delayed for 47 (13%) of these patients (Table 3). The highest peak for treatment intensification

occurred within the first 10 days (Figure 1c). More than half of patients (52%), had a next LDL-C test within 180 days after treatment intensification (Table 2). For 132 (83%) of these patients, this was considered as timely (Table 3). Evaluation of response to treatment most often occurred close to time of the next

**Table 3.** Percentages of patients who received care within predefined time periods.

|                                                                                                                                    | HbA1c      | SBP        | LDL-C      | ACR        |
|------------------------------------------------------------------------------------------------------------------------------------|------------|------------|------------|------------|
|                                                                                                                                    | n = 9439   | n = 9439   | n = 9439   | n = 9439   |
| Adequately managed in the clinical pathway within strict time periods*                                                             | 6776 (72%) | 4969 (53%) | 4479 (47%) | 3989 (42%) |
| <i>Step 1 Risk factor testing in whole population</i>                                                                              |            |            |            |            |
| Risk factor test in 2007                                                                                                           | 8144 (86%) | 8140 (86%) | 6264 (67%) | 4604 (49%) |
| - elevated level                                                                                                                   | 2556 (31%) | 4713 (58%) | 2332 (37%) | 1165 (25%) |
| - return to control within 120 days                                                                                                | 339 (13%)  | 776 (16%)  | 117 (5%)   | 187 (16%)  |
| - maximum treatment                                                                                                                | 242 (9%)   | 73 (2%)    | 150 (6%)   | 227 (19%)  |
| <i>Step 2 Treatment intensification in patients with elevated risk factor level who are not on maximum treatment</i>               |            |            |            |            |
|                                                                                                                                    | n = 759    | n = 895    | n = 355    | n = 136    |
| - prompt reaction (within 30 days)                                                                                                 | 419 (55%)  | 422 (47%)  | 205 (58%)  | 56 (42%)   |
| - lenient reaction (within 31–120 days)                                                                                            | 262 (35%)  | 346 (39%)  | 103 (29%)  | 59 (43%)   |
| - delayed reaction (within 121–180 days)                                                                                           | 78 (10%)   | 127 (14%)  | 47 (13%)   | 21 (15%)   |
| <i>Step 3 Evaluation of response to treatment in patients who received prompt or lenient reaction of treatment intensification</i> |            |            |            |            |
|                                                                                                                                    | n = 637    | n = 589    | n = 160    | n = 87     |
| - too early reaction**                                                                                                             | 39 (6%)    | 53 (9%)    | 2 (1%)     | -          |
| - timely reaction (within 120 days without too early)                                                                              | 563 (88%)  | 514 (87%)  | 132 (83%)  | 87 (76%)+  |
| - delayed reaction (within 121–180 days)                                                                                           | 35 (6%)    | 22 (4%)    | 26 (16%)   | -          |

\*Time periods of prompt and lenient reactions of treatment intensification and timely reaction of response to treatment evaluation.

\*\*Within 42 days for HbA1c, no restriction for FBG, within 14 days for SBP, and within 21 days for LDL-cholesterol, no recommendations for too early ACR.

+Within 1 year period.

doi:10.1371/journal.pone.0024278.t003

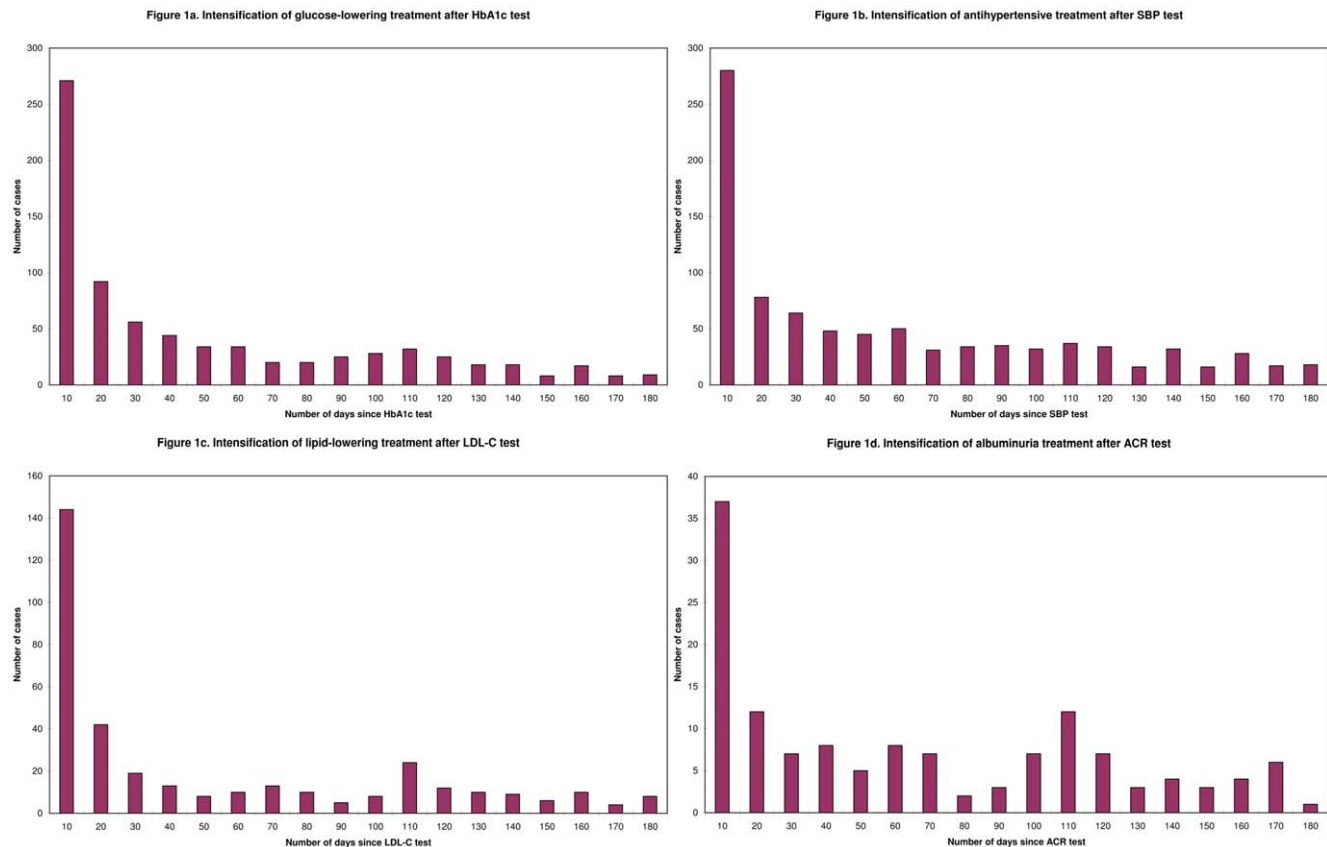

**Figure 1. Timing of treatment intensification after risk factor test (number of patients per 10 days period).**  
doi:10.1371/journal.pone.0024278.g001

regular practice visit (Figure 2c). Mean changes in LDL-C showed a trend to improvement and leveled off after 20 days since treatment intensification ( $p = 0.06$ ). The quality score regarding adequate management reduced significantly due to the second step, and slightly by the third step (Table 2). The overall score for adequate management was not significantly different using wide time periods (46%) in comparison to using strict time windows (47%; OR 0.96, 95% CI 0.90–1.02).

### Albuminuria management

3905 (41%) patients were adequately managed in the clinical pathway using the time periods of 180 days (Table 2). 4604 (49%) patients received at least one ACR test in 2007. Of the 751 patients above target, not returning to control and not on maximum treatment, only 136 (18%) received a treatment intensification. Treatment intensification was prompt for 56 (42%), lenient for 59 (43%) and delayed for 21 (15%) of these patients (Table 3). The highest peak for treatment intensification occurred within the first 10 days (Figure 1d). 52 (38%) patients had a next ACR test within 180 days after treatment intensification (Table 2) and 87 (76%) patients had a next ACR test within a year, which was considered as timely (Table 3). Mean changes in ACR did not show clear improvement on the timeline within 100 days ( $p = 0.98$ ). The quality score regarding adequate management reduced significantly due to the second step but was not much further reduced by the third step (Table 2). The overall score for adequate management was not significantly different using wide time periods (41%) in comparison to using recommended strict time windows (42%; OR 0.96, 95% CI 0.91–1.02).

### Discussion

Quality of risk factor management in diabetes looking at the three-step process of care pathway showed that up to 59% of the patients may receive less care than recommended according to the guidelines. Specifically, quality estimates of glycemic, blood pressure and cholesterol management were substantially reduced when looking at clinical pathways as compared to estimates based on commonly used simple process measures. The assessed quality was higher for glycemic management than for blood pressure or cholesterol and especially albuminuria management, regardless of the time periods used for defining the quality. Suboptimal quality seems mostly driven by lack of treatment intensification for all risk factors, and by lack of risk factor testing for cholesterol and albuminuria management. Although treatment intensifications often occurred within 30 days, taking into account actions until the next regular practice visit almost doubled the estimated quality of treatment intensification for patients with elevated risk factor levels. The percentages of patients who received the recommended care did not significantly increase when further extending time periods for quality assessment up to 180 days.

At each step of the clinical pathway patients received less care than recommended. Regarding risk factor testing, in particular fewer patients received at least one test of LDL-C and ACR within a year. Previous studies also showed room for improvement regarding quality of testing for cholesterol and albuminuria in diabetes patients [8,35,36]. This may be explained by the fact that routine testing of cholesterol and albuminuria is recommended once a year whereas this is half-yearly or quarterly for glycemia and blood pressure. Tests conducted once yearly have a higher chance of

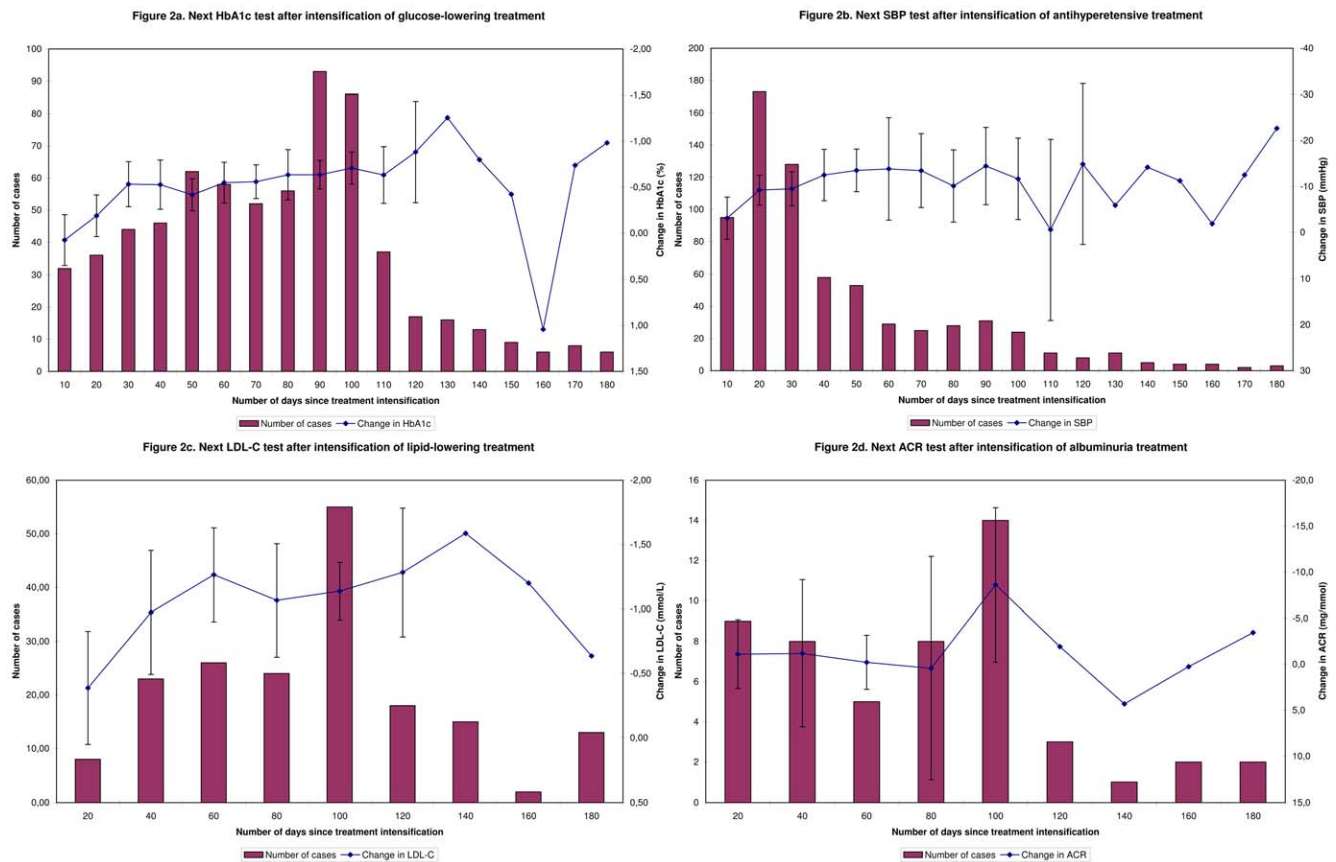

**Figure 2. Timing of response to treatment evaluation after treatment intensification (number of patients per 10- or 20-days period in bars, and 10- or 20-day mean values of changes in risk factor levels in line graphs).**  
doi:10.1371/journal.pone.0024278.g002

falling just outside a fixed observation period of 12 months. This would support the choice made in the British Quality and Outcome Framework system to use periods of 15 months instead of 12 months for quality assessment of risk factor testing [19].

Regarding treatment intensification among patients with elevated risk factors level, the low rates observed are consistent with previous studies in the Netherlands [7,8,11] and in other health care settings [31,37–40]. Patients received more treatment intensification in response to elevated levels of HbA1c than SBP, LDL-C and ACR, which is also in line with previous studies [7,11,41]. Allowing for treatment intensification on the next regular visit, i.e. within 120 days in The Netherlands, covers more than 85% of the intensifications occurring after elevated levels. This could be considered as a reasonable time period based on current clinical practice [17,18]. In general, however, the intensification rates remained low. This shows that delay in action is not the most important factor for the observed low rates. Other explanations have been suggested, such as uncertainty regarding elevated risk factor levels, disagreement with guideline recommendations, the inability to intensify treatment in some patients, and refusal by patients [9,42,43]. Previous studies in our study population showed, however, that factors such as medication burden and medication non-adherence were not associated with lower treatment intensification rates [11,44]. We excluded patients who were already on maximum treatment or returned to control, but there may still be some patients who did not tolerate or wanted to receive a treatment intensification. This would result in underestimates of the quality of care.

The third step of the clinical pathway, response to treatment evaluation, has not been studied before as part of quality assessment in diabetes management. Our findings demonstrated that, similar to risk factor testing in general, response to treatment evaluation is conducted more often for HbA1c and SBP management than for LDL-C and ACR management. This evaluation is also liable to setting of different time periods. Evaluation of treatment can be conducted not only too late but also too early. Too early evaluation can satisfy the definition of a quality indicator but be irrelevant from a clinical point of view. Few patients received an HbA1c test within six weeks after intensification of glucose-lowering treatment, which is too early according to Dutch guideline [16]. Other guidelines, such as from the American Diabetes Association, consider longer periods of 2–3 months over which HbA1c reflects changes [14]. In turn, we observed improvements in mean HbA1c levels already after a period of 20 days, which could indicate that for clinical practice assessment a minimum period of 3 weeks could be adequate for response to glucose-lowering treatment evaluation. For evaluating response to antihypertensive treatment, guidelines recommend to measure the SBP after 2–4 weeks. This corresponds with improvements in mean SBP levels we observed after 10 days, indicating that a minimum period of 2 weeks could be used as adequate for response to antihypertensive treatment evaluation. For lipid-lowering treatment, the Dutch guideline states that an evaluation should take place after several weeks, which we defined as 3 weeks [16]. The American guideline recommends a minimal period of 6 weeks for response to treatment evaluation [45]. Our

findings indicate that a minimum period of 3 weeks could be used to reflect adequate response to lipid-lowering treatment evaluation. Regarding evaluation of response to RAAS-i treatment in case of albuminuria, it has only been stated that repeated testing is reasonable [46], but guidelines recommend only annual routine testing of ACR [14,16]. In our study, no firm conclusions can be drawn due to the small numbers of patients with recurrent ACR tests.

The strength of our study is that it was conducted using a non-restricted population of primary care patients with type 2 diabetes using data from medical records. It reflects quality of diabetes care in the northern part of the Netherlands which may differ from other countries. It is limited to process of care assessment, whereas quality of care can also be assessed by including (intermediate) outcome measures. This is, for example, the case in the British Quality and Outcome Framework [19]. The chosen definitions of adequate care are consistent with other international and national guidelines for type 2 diabetes [14,15,47–49]. Although one might question whether treatment intensification is needed or wanted in all patients above the defined target values, especially given recent findings of published clinical trials [50,51], our study reflects quality of care as measured according to recommendations in prevailing diabetes guidelines at the time of our study. The quality measures we used were derived from these guideline, and as such can be considered content valid. There is, however, limited evidence for their predictive validity regarding patient outcomes [52]. We considered changes in treatment after one elevated level as adequate, since in this type of longitudinal observational study this can already be a recurrent elevated risk factor measurement.

We based our proposed time periods on a combination of guideline recommendations and feasibility in daily practice. Ultimately, definitions of the optimal time periods should be based on their impact on health outcomes. The effect of the time period definitions on quality assessment is likely to depend on reimbursement, and local or national organization and agreements for regular or standard care. In the Netherlands, as in many other countries, diabetes patients usually have a regular visit with their health care provider every three months. Our predefined time

periods may be less applicable for settings where this is not the case. To assess too early response to treatment evaluation, we chose 10-day and 20-day intervals to have sufficient numbers of patients on the one hand, and clinically meaningful time intervals on the other. For albuminuria, however, this resulted in small numbers of patients per interval and unreliable outcome estimates.

Study data were obtained from electronic patient records of general practices using validated procedures [53]. Such patient records provide detailed clinical information, however, they may be incomplete and contain misclassifications. Especially, tests and drugs prescribed by specialists in the hospital can be missed. Since we included only patients who are primarily managed by their general practitioner, this will be uncommon for our study population. Furthermore, dates of tests in patient records may be imprecise, either reflecting the date when the test was performed or the date when the result was received in the practice. This was taken into account by defining prompt reaction to testing as any action within a period of 30 days.

In conclusion, looking at the overall pathway of risk factor management in diabetes significantly lowers estimates of quality as compared to the assessment based on commonly used simple process measures. Our study showed that this reduction is mostly driven by lack of treatment intensification for all risk factors. Based on our findings from clinical practice, a period of 12 months may be too short for assessing annual testing of risk factors such as cholesterol and albuminuria. For assessing intensification of treatment and response to treatment, it seems reasonable to allow for the next routine diabetes visit. Extension of the time periods for quality assessment up to half a year did not significantly influence the quality estimates.

## Author Contributions

Development of conception and formulating of a research question: GS PD DdZ FMH-R. Acquisition of data: PD. Analysis and interpretation of data: GS PD. Drafting of the article: GS. Critical revising: GS PD DdZ FMH-R. Final approval: GS PD DdZ FMH-R.

## References

1. Brook RH, McGlynn EA, Shekelle PG (2000) Defining and measuring quality of care: A perspective from US researchers. *Int J Qual Health Care* 12(4): 281–295.
2. Donabedian A (1988) The quality of care. how can it be assessed? *JAMA* 260(12): 1743–1748.
3. Ellrodt G, Cook DJ, Lee J, Cho M, Hunt D, et al. (1997) Evidence-based disease management. *JAMA* 278(20): 1687–1692.
4. Nicolucci A, Rossi MC, Arcangeli A, Cimino A, de Gigontina G, et al. (2010) Four-year impact of a continuous quality improvement effort implemented by a network of diabetes outpatient clinics: The AMD-annals initiative. *Diabet Med* 27(9): 1041–1048.
5. Trivedi AN, Grebla RC, Wright SM, Washington DL (2011) Despite improved quality of care in the veterans affairs health system, racial disparity persists for important clinical outcomes. *Health Aff (Millwood)* 30(4): 707–715.
6. Rodondi N, Peng T, Karter AJ, Bauer DC, Vittinghoff E, et al. (2006) Therapy modifications in response to poorly controlled hypertension, dyslipidemia, and diabetes mellitus. *Ann Intern Med* 144(7): 475–484.
7. van Bruggen R, Gorter K, Stolk R, Klungel O, Rutten G (2009) Clinical inertia in general practice: Widespread and related to the outcome of diabetes care. *Fam Pract* 26(6): 428–436.
8. Voorham J, Haaijer-Ruskamp FM, van der Meer K, de Zeeuw D, Wolffenbuttel BH, et al. (2010) Identifying targets to improve treatment in type 2 diabetes: the groningen initiative to analyse type 2 diabetes treatment (GIANTT) observational study. *Pharmacoepidemiol Drug Saf* 19(10): 1078–1086.
9. Kerr EA, Zikmund-Fisher BJ, Klamers ML, Subramanian U, Hogan MM, et al. (2008) The role of clinical uncertainty in treatment decisions for diabetic patients with uncontrolled blood pressure. *Ann Intern Med* 148(10): 717–727.
10. Sperl-Hillen JM, O'Connor PJ (2005) Factors driving diabetes care improvement in a large medical group: Ten years of progress. *Am J Manag Care* 11(5 Suppl): S177–85.
11. Voorham J, Haaijer-Ruskamp FM, Stolk RP, Wolffenbuttel BH, Denig P, et al. (2008) Influence of elevated cardiometabolic risk factor levels on treatment changes in type 2 diabetes. *Diabetes Care* 31(3): 501–503.
12. De Berardis G, Pellegrini F, Franciosi M, Belfiglio M, Di Nardo B, et al. (2008) Quality of diabetes care predicts the development of cardiovascular events: Results of the QuED study. *Nutr Metab Cardiovasc Dis* 18(1): 57–65.
13. Gorter K, van Bruggen R, Stolk R, Zuithoff P, Verhoeven R, et al. (2008) Overall quality of diabetes care in a defined geographic region: Different sides of the same story. *Br J Gen Pract* 58(550): 339–345.
14. American Diabetes Association (2011) Standards of medical care in diabetes—2011. *Diabetes Care* 34 Suppl 1: S11–61.
15. IDF Clinical Guidelines Task Force (2006) Global guideline for type 2 diabetes: Recommendations for standard, comprehensive, and minimal care. *Diabet Med* 23(6): 579–593.
16. Rutten GE, De Grauw WJ, Nijpels G, Goudswaard AN, Uitewaal P, et al. (2006) [NHG-standaard diabetes mellitus type 2 (second revision)]. *Huisarts Wet* 49(3): 137–152.
17. Shekelle PG, Woolf SH, Eccles M, Grimshaw J (1999) Clinical guidelines: Developing guidelines. *BMJ* 318(7183): 593–596.
18. Schunemann HJ, Fretheim A, Oxman AD, WHO Advisory Committee on Health Research (2006) Improving the use of research evidence in guideline development: 1. guidelines for guidelines. *Health Res Policy Syst* 4: 13.
19. British Medical Association (BMA) and NHS Employers (2009) Quality and outcomes framework guidance for GMS contract 2009/10. : 162.
20. National Committee for Quality Assurance (NCQA) (2010) HEDIS® 2011: Healthcare effectiveness data and information set. vol. 1, narrative. : various.
21. Nicolucci A, Greenfield S, Matke S (2006) Selecting indicators for the quality of diabetes care at the health systems level in OECD countries. *Int J Qual Health Care* 18 Suppl 1: 26–30.
22. Office of Quality Performance (2009) FY 2009, Q2 technical manual for the VHA performance measurement system. : various.

23. Brown JB, Nichols GA, Perry A (2004) The burden of treatment failure in type 2 diabetes. *Diabetes Care* 27(7): 1535–1540.
24. Kuritzky L, Epstein BJ, Lavernia F (2010) How to obtain appropriate type 2 diabetes control in the first 180 days of treatment initiation. *Postgrad Med* 122(3): 33–42.
25. Phillips LS, Twombly JG (2008) It's time to overcome clinical inertia. *Ann Intern Med* 148(10): 783–785.
26. Turner BJ, Hollenbeak CS, Weiner M, Ten Have T, Tang SS (2008) Effect of unrelated comorbid conditions on hypertension management. *Ann Intern Med* 148(8): 578–586.
27. Berlowitz DR, Ash AS, Glickman M, Friedman RH, Pogach LM, et al. (2005) Developing a quality measure for clinical inertia in diabetes care. *Health Serv Res* 40(6 Pt 1): 1836–1853.
28. Selby JV, Uratsu CS, Fireman B, Schmittiel JA, Peng T, et al. (2009) Treatment intensification and risk factor control: Toward more clinically relevant quality measures. *Med Care* 47(4): 395–402.
29. Voorham J, Haaijer-Ruskamp FM, Wolffenbuttel BH, Stolk RP, Denig P, et al. (2011) Medication adherence affects treatment modifications in patients with type 2 diabetes. *Clin Ther* 33(1): 121–134.
30. Grant RW, Cagliero E, Dubey AK, Gildesgame C, Chueh HC, et al. (2004) Clinical inertia in the management of type 2 diabetes metabolic risk factors. *Diabet Med* 21(2): 150–155.
31. Ziemer DC, Miller CD, Rhee MK, Doyle JP, Watkins C, Jr., et al. (2005) Clinical inertia contributes to poor diabetes control in a primary care setting. *Diabetes Educ* 31(4): 564–571.
32. Wens J, Dirven K, Mathieu C, Paulus D, Van Royen P, et al. (2007) Quality indicators for type-2 diabetes care in practice guidelines: An example from six european countries. *Prim Care Diabetes* 1(1): 17–23.
33. Martirosyan L, Voorham J, Haaijer-Ruskamp FM, Braspenning J, Wolffenbuttel BH, et al. (2010) A systematic literature review: Prescribing indicators related to type 2 diabetes mellitus and cardiovascular risk management. *Pharmacoeconom Drug Saf* 19(4): 319–334.
34. Dutch Health Care Insurance Board (Commissie Farmaceutische Hulp van het College van Zorgverzekeringen) (2009) *Dutch pharmacotherapy compendium (Kompas)*, 2009.
35. Aakre KM, Thue G, Subramaniam-Haavik S, Cooper J, Bukve T, et al. (2010) Diagnosing microalbuminuria and consequences for the drug treatment of patients with type 2 diabetes: A european survey in primary care. *Diabetes Res Clin Pract* 89(2): 103–109.
36. Massing MW, Henley NS, Carter-Edwards L, Schenck AP, Simpson RJ, Jr. (2003) Lipid testing among patients with diabetes who receive diabetes care from primary care physicians. *Diabetes Care* 26(5): 1369–1373.
37. Phillips LS, Branch WT, Cook CB, Doyle JP, El-Kebbi IM, et al. (2001) Clinical inertia. *Ann Intern Med* 135(9): 825–834.
38. Triplitt C (2010) Improving treatment success rates for type 2 diabetes: Recommendations for a changing environment. *Am J Manag Care* 16(7 Suppl): S195–200.
39. Zafar A, Davies M, Azhar A, Khunti K (2010) Clinical inertia in management of T2DM. *Prim Care Diabetes* 4(4): 203–207.
40. Charpentier G, Genes N, Vaur L, Amar J, Clerson P, et al. (2003) Control of diabetes and cardiovascular risk factors in patients with type 2 diabetes: A nationwide french survey. *Diabetes Metab* 29(2 Pt 1): 152–158.
41. Greving JP, Denig P, de Zeeuw D, Bilo HJ, Haaijer-Ruskamp FM (2007) Trends in hyperlipidemia and hypertension management in type 2 diabetes patients from 1998–2004: A longitudinal observational study. *Cardiovasc Diabetol* 6: 25.
42. AB E, Denig P, van Vliet T, Dekker J (2009) Reasons of general practitioners for not prescribing lipid-lowering medication to patients with diabetes: A qualitative study. *BMC Family Practice* 10(1): 24.
43. Viera AJ, Schmid D, Bostrom S, Yow A, Lawrence W, et al. (2010) Level of blood pressure above goal and clinical inertia in a medicaid population. *J Am Soc Hypertens* 4(5): 244–254.
44. Voorham J, Haaijer-Ruskamp FM, Wolffenbuttel BH, Stolk RP, Denig P, et al. (2010) Cardiometabolic treatment decisions in patients with type 2 diabetes: The role of repeated measurements and medication burden. *Qual Saf Health Care* 19(5): 411–415.
45. National Cholesterol Education Program. Expert Panel on Detection, Evaluation, and Treatment of High Blood Cholesterol in Adults (2001 (Updated 2004)) Third report of the expert panel on detection, evaluation, and treatment of high blood cholesterol in adults (adult treatment panel III).
46. Sacks DB, Bruns DE, Goldstein DE, Maclaren NK, McDonald JM, et al. (2002) Guidelines and recommendations for laboratory analysis in the diagnosis and management of diabetes mellitus. *Clin Chem* 48(3): 436–472.
47. Colagiuri R, Girgis S, Gomez M, Walker K, Colagiuri S, O'Dea K (2009) National evidence based guideline for the primary prevention of type 2 diabetes. Available: [www.diabetesaustralia.com.au/For-Health-Professionals/Diabetes-National-Guidelines/](http://www.diabetesaustralia.com.au/For-Health-Professionals/Diabetes-National-Guidelines/) Accessed 16 June 2011.
48. National Collaborating Centre for Chronic Conditions (2008) Type 2 diabetes: National clinical guideline for management in primary and secondary care (update). Available: <http://guidance.nice.org.uk/CG66> Accessed 16 June 2011.
49. Canadian Diabetes Association (2008) Clinical practice guidelines for the prevention and management of diabetes in canada. *Can J Diab* 32(Supplement 1).
50. Hoogwerf BJ, Action to Control Cardiovascular Risk in, Diabetes Study Group (2008) Does intensive therapy of type 2 diabetes help or harm? Seeking accord on ACCORD. *Cleve Clin J Med* 75(10): 729–737.
51. ADVANCE Collaborative Group, Patel A, MacMahon S, Chalmers J, Neal B, et al. (2008) Intensive blood glucose control and vascular outcomes in patients with type 2 diabetes. *N Engl J Med* 358(24): 2560–2572.
52. Sidorenkov G, Haaijer-Ruskamp FM, de Zeeuw D, Bilo H, Denig P (2011) Review: Relation between quality-of-care indicators for diabetes and patient outcomes: A systematic literature review. *Med Care Res Rev* 68(3): 263–289.
53. Voorham J, Denig P (2007) Computerized extraction of information on the quality of diabetes care from free text in electronic patient records of general practitioners. *J Am Med Inform Assoc* 14(3): 349–354.
